# Supplementary material for: Molecular basis of ligand-dependent Nurr1-RXRα activation
Source: eLife journal article supplement (doi:10.7554/elife.85039), 2023-04-27
Supplement: fig3-data1 [file elife-85039-fig3-data1-v3.zip]

## Sheet: Figure 3–source data 1
	mean	s.d	n	replicates
PA452	-3.45663	0.670608	9	-4.65001	-4.39347	-3.77706	-3.25272	-3.21695	-3.20013	-2.90982	-2.90383	-2.80563
Danthron	-0.914597	1.18125	9	-2.24552	-2.0048	-1.87624	-1.77477	-0.925477	-0.783382	-0.227402	0.531387	1.07482
HX531	-0.800722	1.55884	9	-2.63902	-2.02489	-1.88351	-1.63795	-1.58578	-0.750174	0.432476	0.942849	1.93951
Rhein	-0.448486	1.12847	9	-3.19457	-0.679483	-0.618341	-0.477529	-0.393298	0.0606353	0.333708	0.377035	0.555473
IRX4204	0.878682	1.19847	9	-0.820865	0.0418224	0.313898	0.407392	0.692722	0.796051	0.959096	2.4114	3.10662
LG100754	1.40153	1.23735	9	-1.06458	0.610487	1.05573	1.29089	1.38339	1.60045	1.69537	2.88472	3.15736
UVI3003	1.62772	2.1425	9	-1.63837	-0.127637	0.227814	0.682318	0.688446	2.85279	3.33181	3.88123	4.75105
SR11237	2.5787	1.16135	9	0.689871	1.3278	1.73641	2.47325	2.67521	3.03037	3.37114	3.55029	4.35398
CD3254	3.15017	1.63283	9	1.2564	1.46804	1.62539	2.1265	3.40449	3.46649	4.15701	5.3123	5.53492
LG100268	3.34304	1.69656	9	-0.537103	2.46655	3.06957	3.13855	3.7665	3.89605	4.20946	4.81675	5.26099
Bexarotene	4.64385	1.68666	9	2.62262	3.53989	3.66887	3.77833	4.07463	4.95685	4.98279	5.80158	8.36912
9-cis-RA	5.25402	1.44782	9	3.29033	4.0001	4.13164	4.41327	5.03823	5.68214	6.21233	6.9543	7.56387
HX600	9.9675	4.31235	9	4.89613	5.76295	6.26905	7.37217	10.4115	10.6787	12.0425	14.7555	17.5191
BRF110	10.7024	2.24477	9	5.63312	9.12534	10.5979	10.7946	10.8323	11.4854	12.2856	12.3901	13.1768
DMSO	-4.93432e-16	1.80365	9	-2.03074	-1.83349	-1.29048	-1.09479	-0.259327	0.111801	1.0114	2.50475	2.88087
