# Supplementary material for: Molecular basis of ligand-dependent Nurr1-RXRα activation
Source: eLife journal article supplement (doi:10.7554/elife.85039), 2023-04-27
Supplement: fig4-data1 [file elife-85039-fig4-data1-v3.zip]

## Sheet: Figure 4–source data 1
	mean	s.d	n	replicates
PA425	0.524333	0.00493288	3	0.521	0.522	0.53
Danthron
HX531	0.549	0.0291376	3	0.581	0.524	0.542
Rhein
IRX4204	3.49633	0.102002	3	3.508	3.389	3.592
LG100754	0.583	0.0277849	3	0.569	0.565	0.615
UVI3003	0.565	0.0177764	3	0.551	0.585	0.559
SR11237	2.80667	0.0673003	3	2.814	2.87	2.736
CD3254	2.46933	0.0500133	3	2.492	2.412	2.504
LG100268	2.788	0.0468081	3	2.842	2.759	2.763
Bexarotene	2.86567	0.0102632	3	2.877	2.863	2.857
9-cis-RA	2.83567	0.0512868	3	2.78	2.881	2.846
HX600	0.764	0.0164621	3	0.783	0.755	0.754
BRF110	0.669	0.0112694	3	0.656	0.675	0.676
DMSO	0.657667	0.026839	3	0.648	0.688	0.637
