# Supplementary material for: Molecular basis of ligand-dependent Nurr1-RXRα activation
Source: eLife journal article supplement (doi:10.7554/elife.85039), 2023-04-27
Supplement: fig4-data2 [file elife-85039-fig4-data2-v3.zip]

## Sheet: Figure 4–source data 2
	mean	s.d	n	replicates
PA452	0.549329	0.0725347	6	0.670301	0.571231	0.549326	0.472217	0.477179	0.555722
Danthron
HX531	0.757444	0.0718394	6	0.786119	0.6723	0.83282	0.837564	0.68884	0.72702
Rhein
IRX4204	18.9273	2.3451	6	17.6846	16.4238	17.8878	18.634	19.7901	23.1433
LG100754	4.29816	0.528107	6	3.92055	4.12254	3.8808	4.27021	4.27423	5.32066
UVI3003	0.927531	0.0738383	6	1.00296	0.880591	0.809632	0.947266	0.998773	0.925965
SR11237	18.5353	3.47118	6	19.4075	15.0894	17.8638	15.5268	18.6159	24.708
CD3254	20.6876	1.84376	6	20.5801	19.9231	18.9511	19.4401	21.1334	24.098
LG100268	19.284	1.19727	6	18.9647	18.0678	18.5677	19.3579	19.212	21.534
Bexarotene	18.8808	1.88115	6	21.4584	17.0612	17.2789	17.6551	19.0411	20.7899
9-cis-RA	18.6804	1.68896	6	21.2634	20.2545	17.8771	17.0103	17.4771	18.1999
HX600	5.54922	0.622449	6	6.45912	5.43799	4.81222	5.00628	5.52231	6.05739
BRF110	0.947886	0.262687	6	1.1357	1.28689	0.773898	0.940395	1.0042	0.546232
DMSO	-2.22045e-16	0.0820818	6	0.106798	-0.0161341	0.0573251	-0.0616615	-0.118018	0.0316913
