# Supplementary material for: Molecular basis of ligand-dependent Nurr1-RXRα activation
Source: eLife journal article supplement (doi:10.7554/elife.85039), 2023-04-27
Supplement: fig6-data1 [file elife-85039-fig6-data1-v3.zip]

## Sheet: Figure 6–source data 1
	Replicate 1						Replicate 2						Average and Propagated Error
	int(monomer)	error(monomer)	int(heterodimer)	error(heterodimer)	% monomer	propagated error monomer	int(monomer)	error(monomer)	int(heterodimer)	error(heterodimer)	% monomer	propagated error monomer	average	propagated error
PA452	4.7262	0.70255	13.0294	0.70255	0.266181	0.0308868							0.266181	0.0154434
Danthron	0.695079	0.695079	10.3248	0.695079	0.063075	0.0592303	0.47639	0.47639	4.74135	0.47639	0.091302	0.0833837	0.0771885	0.0511397
HX531	0.684568	0.684568	13.1275	0.684568	0.0495631	0.0471706	0.4716	0.4716	3.55791	0.4716	0.117037	0.104243	0.0832999	0.0572094
Rhein	0.698047	0.698047	14.9439	0.698047	0.0446265	0.0426815	0.49662	0.49662	6.3844	0.49662	0.0721724	0.0671659	0.0583995	0.0397899
IRX4204	9.22726	0.706495	10.7035	0.706495	0.462965	0.0251338							0.462965	0.0125669
LG100754	4.54469	0.682343	13.5917	0.682343	0.250584	0.0297296	3.47873	0.48534	6.63515	0.48534	0.343956	0.0355464	0.29727	0.02317
UVI3003	11.5131	0.696537	12.9429	0.696537	0.470767	0.0201736	4.38075	0.47779	4.05794	0.47779	0.519127	0.0400649	0.494947	0.0224286
SR11237	5.21655	0.688048	11.8073	0.688048	0.306426	0.0306459	6.32428	0.49252	5.84265	0.49252	0.519793	0.0286463	0.413109	0.0209749
CD3254	8.27929	0.699763	12.9916	0.699763	0.389232	0.0238262	3.56432	0.46776	4.49529	0.46776	0.442245	0.0413116	0.415738	0.023845
LG100268	4.43584	0.699526	12.0097	0.699526	0.269729	0.0331138	4.9189	0.50408	6.10697	0.50408	0.446124	0.0325146	0.357926	0.0232041
Bexarotene	7.91961	0.706524	12.6346	0.706524	0.385303	0.0249371	4.53177	0.48229	4.90845	0.48229	0.480049	0.036154	0.432676	0.02196
9-cis-RA	8.24565	0.695205	13.153	0.695205	0.385336	0.0235691	5.05507	0.49191	5.01011	0.49191	0.502233	0.0345584	0.443785	0.0209152
HX600	6.65254	0.725061	13.4379	0.725061	0.331129	0.0269355	6.05655	0.56038	3.17202	0.56038	0.656283	0.0449857	0.493706	0.0262166
BRF110	7.62404	0.711011	5.10956	0.711011	0.598734	0.0402454	5.77355	0.56102	0.56102	0.56102	0.911435	0.0811013	0.755085	0.045269
DMSO	0.69413	0.69413	13.9541	0.69413	0.0473865	0.0330426	0.48112	0.48112	6.32911	0.48112	0.0706467	0.0658451	0.0590166	0.0368354
