# Supplementary material for: Molecular basis of ligand-dependent Nurr1-RXRα activation
Source: eLife journal article supplement (doi:10.7554/elife.85039), 2023-04-27
Supplement: supp [file Figure 1–source data 1.xlsx]

## Sheet: Figure 1–source data 1
Empty vector	Nurr1-FL alone	Nurr1-FL + RXRα FL	Nurr1-FL + ΔAF1-RXRα	Nurr1-FL + RXRα-ΔLBD	Nurr1-FL + RXRα-LBD
1.03216	30.945	12.179	19.4467	19.7947	18.2148
1.13986	36.3578	13.8397	25.7996	15.5324	18.0585
0.813568	26.1425	9.20406	17.8077	30.8547	17.8435
1.03673	33.2755	11.554	24.3345	28.3986	17.8205
1.39763	24.7193	10.2078	22.5327	28.3689	14.7544
0.782067	28.6763	11.8073	21.8909	31.4618	16.5138
0.928285	26.6918	15.2547	18.8856	27.6005	14.8275
0.943408	28.6385	16.4544	18.2141	17.7734	15.3456
0.926293	33.8314	12.9607	16.079	23.7541	24.0185
