# Supplementary figures and images for: Molecular basis of ligand-dependent Nurr1-RXRα activation
Source: eLife journal article supplement (doi:10.7554/elife.85039), 2023-04-27

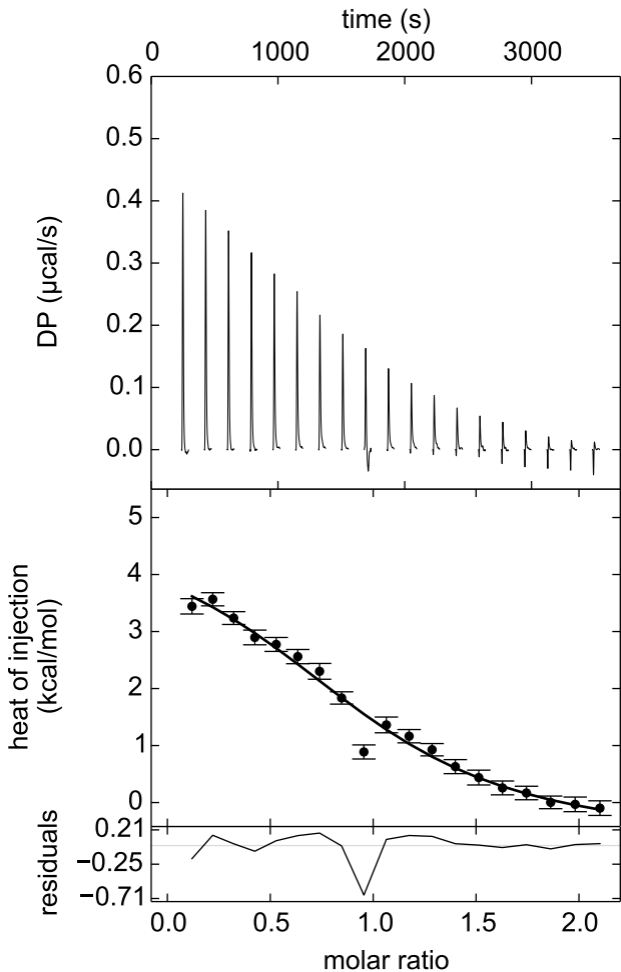

Supplement: supp [file elife-85039-supp-v1.zip]

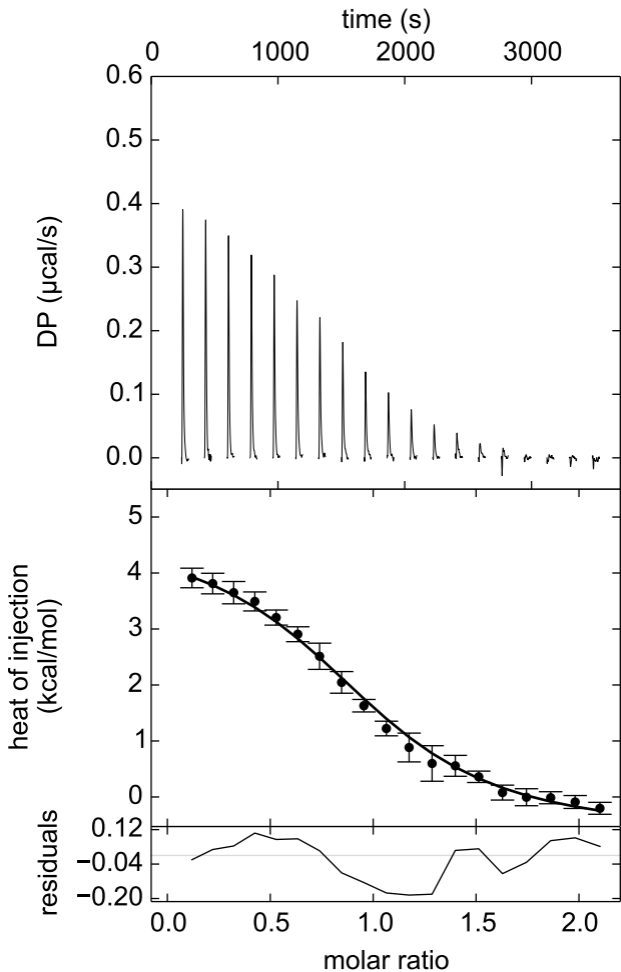

Supplement: supp [file elife-85039-supp-v1.zip]

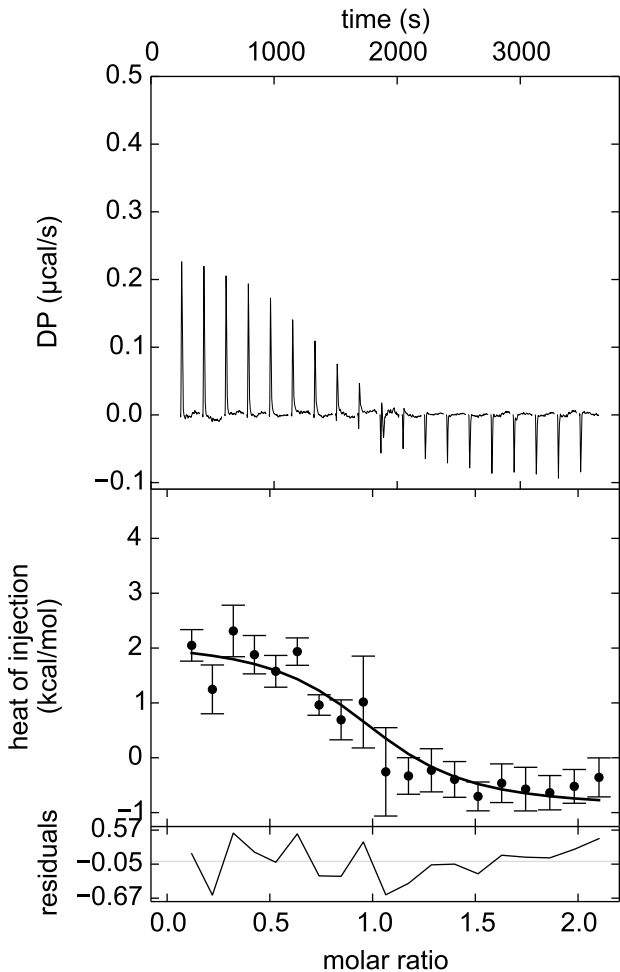

Supplement: supp [file elife-85039-supp-v1.zip]

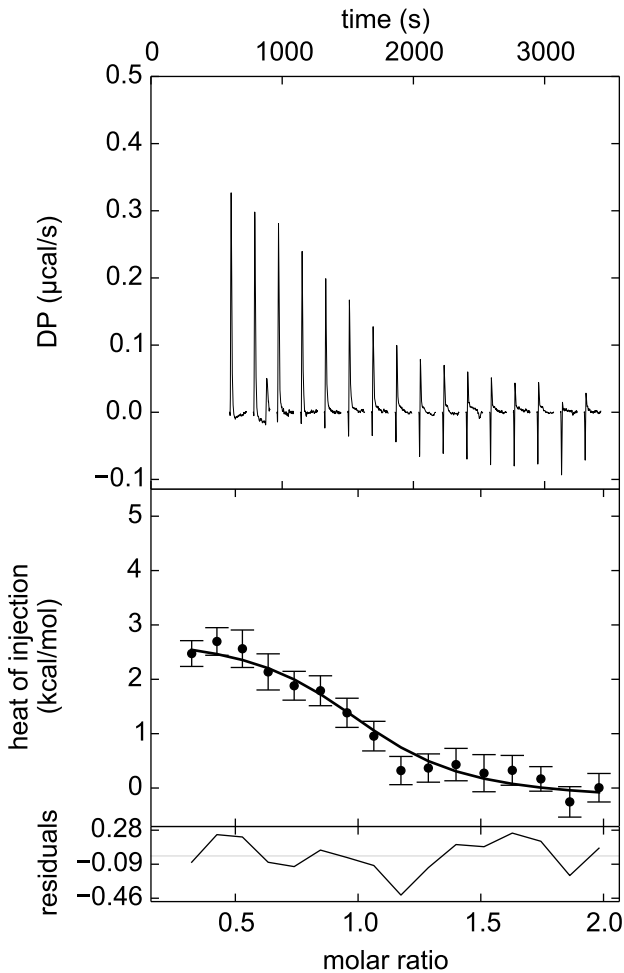

Supplement: supp [file elife-85039-supp-v1.zip]

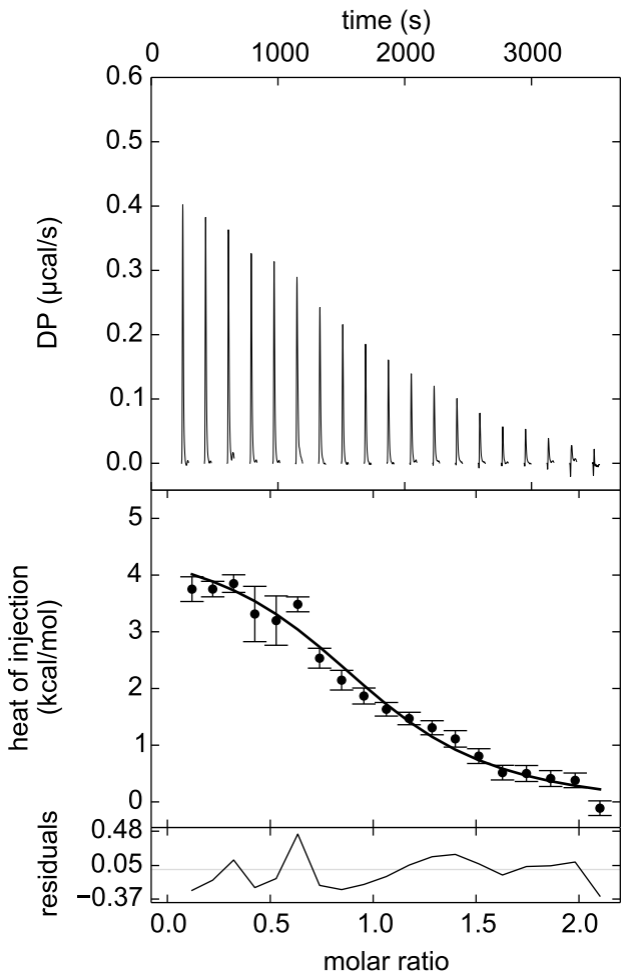

Supplement: supp [file elife-85039-supp-v1.zip]

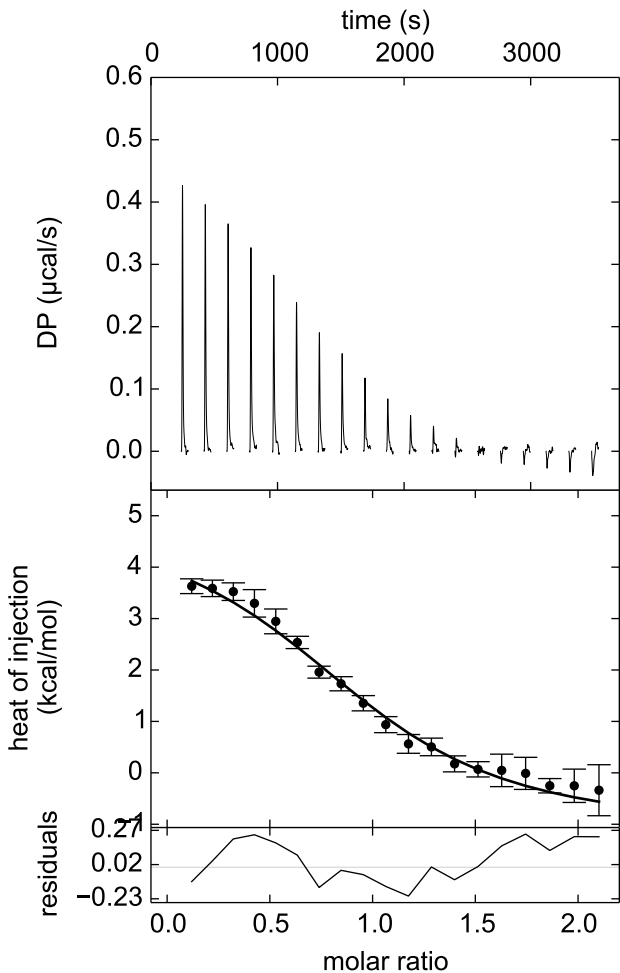

Supplement: supp [file elife-85039-supp-v1.zip]

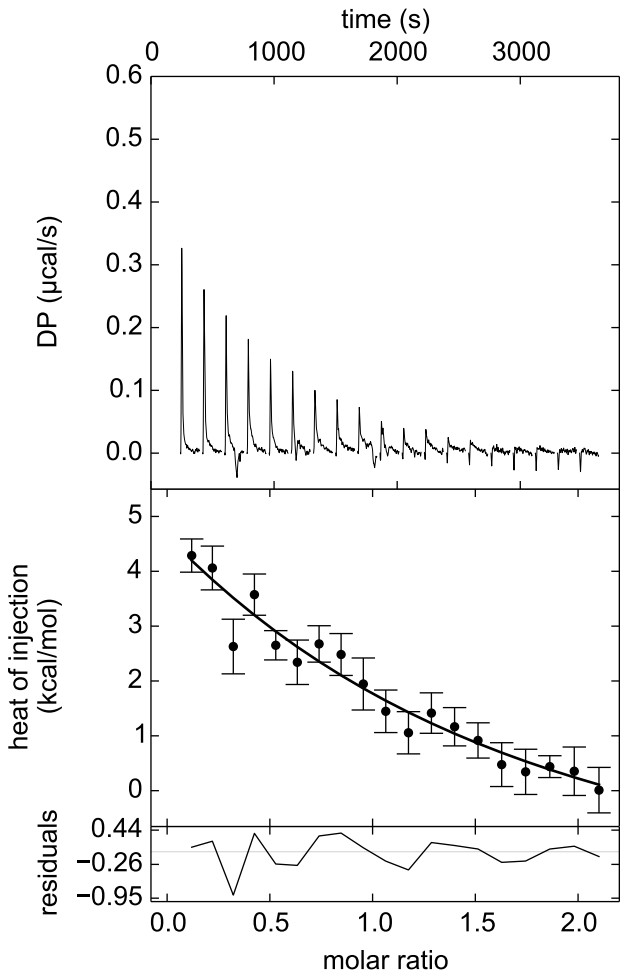

Supplement: supp [file elife-85039-supp-v1.zip]

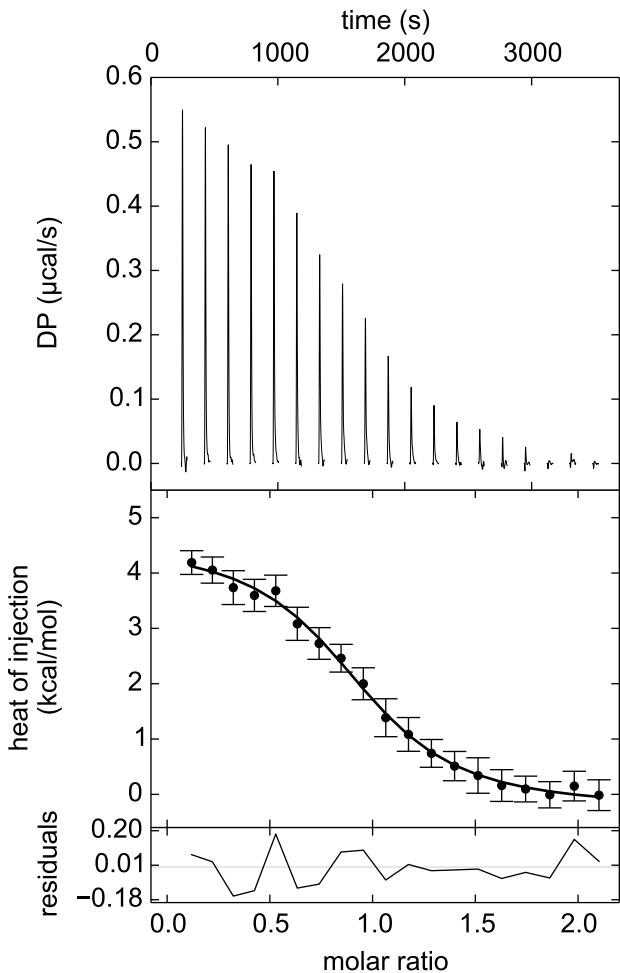

Supplement: supp [file elife-85039-supp-v1.zip]

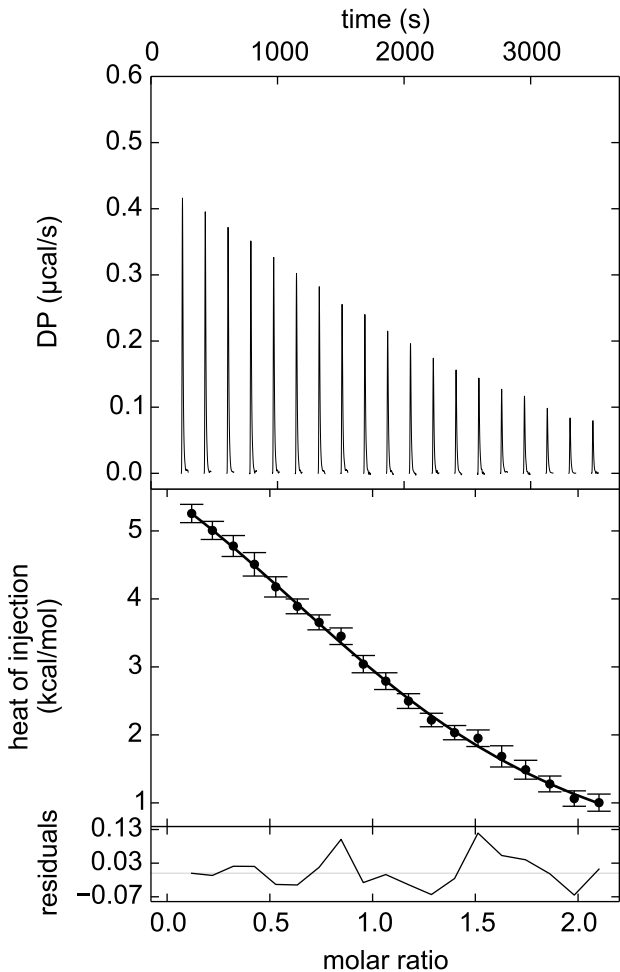

Supplement: supp [file elife-85039-supp-v1.zip]

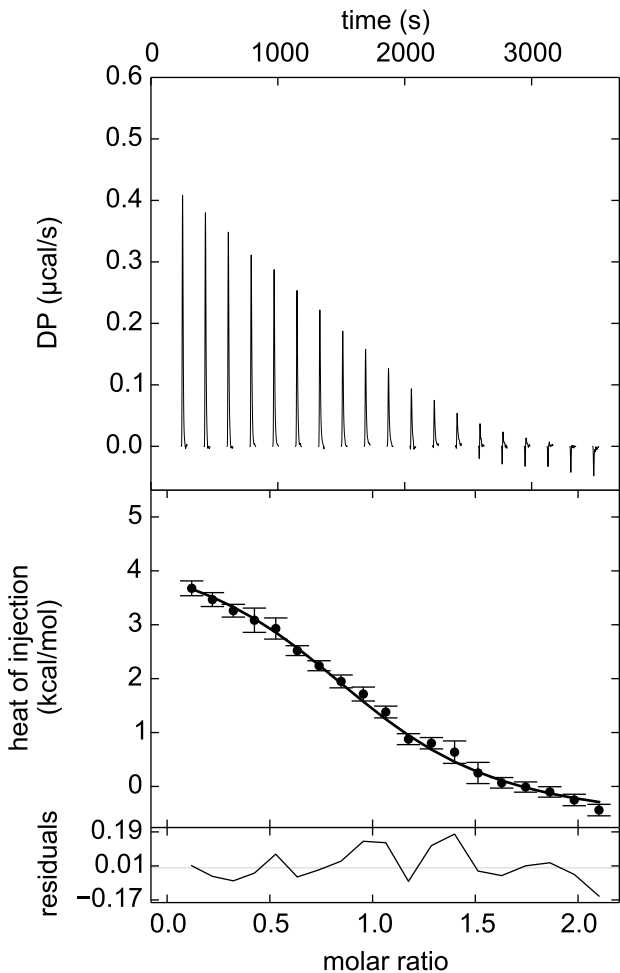

Supplement: supp [file elife-85039-supp-v1.zip]

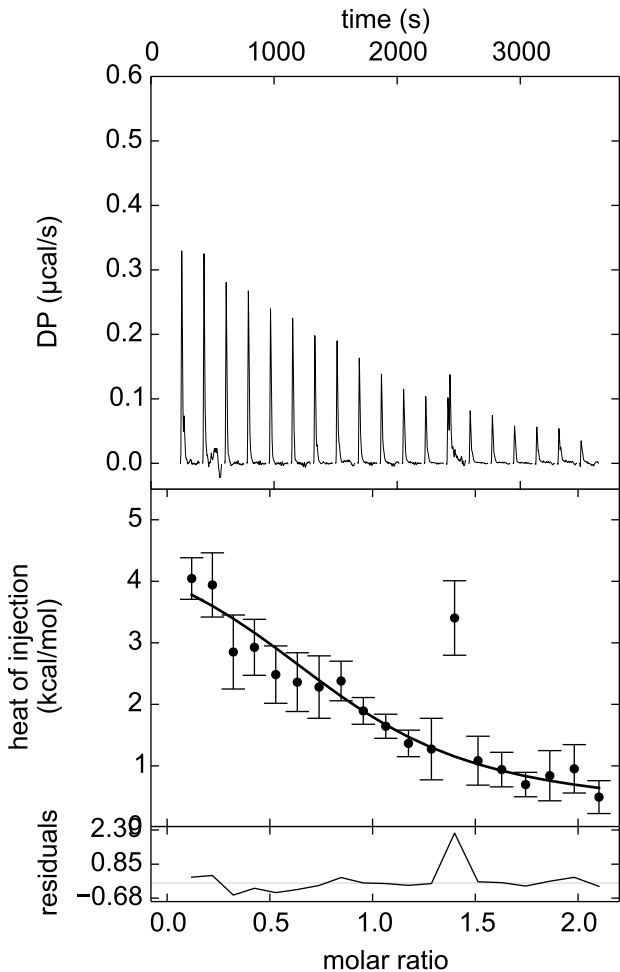

Supplement: supp [file elife-85039-supp-v1.zip]

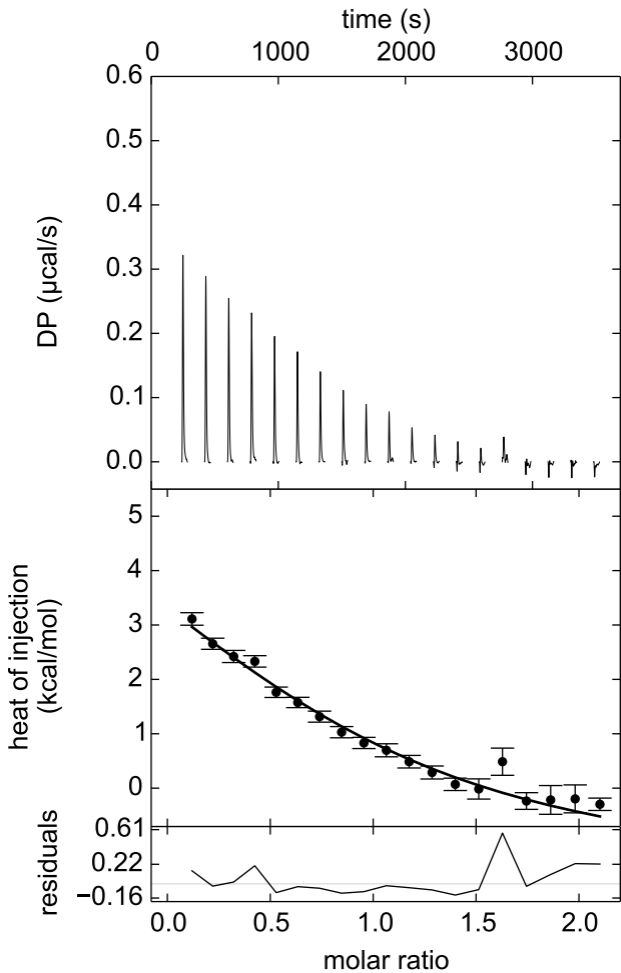

Supplement: supp [file elife-85039-supp-v1.zip]

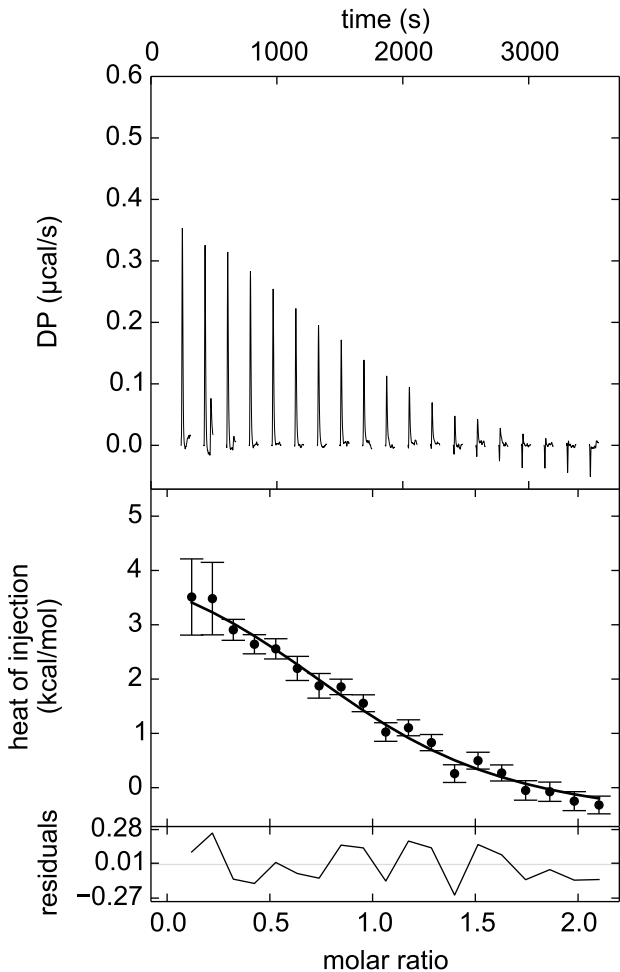

Supplement: supp [file elife-85039-supp-v1.zip]

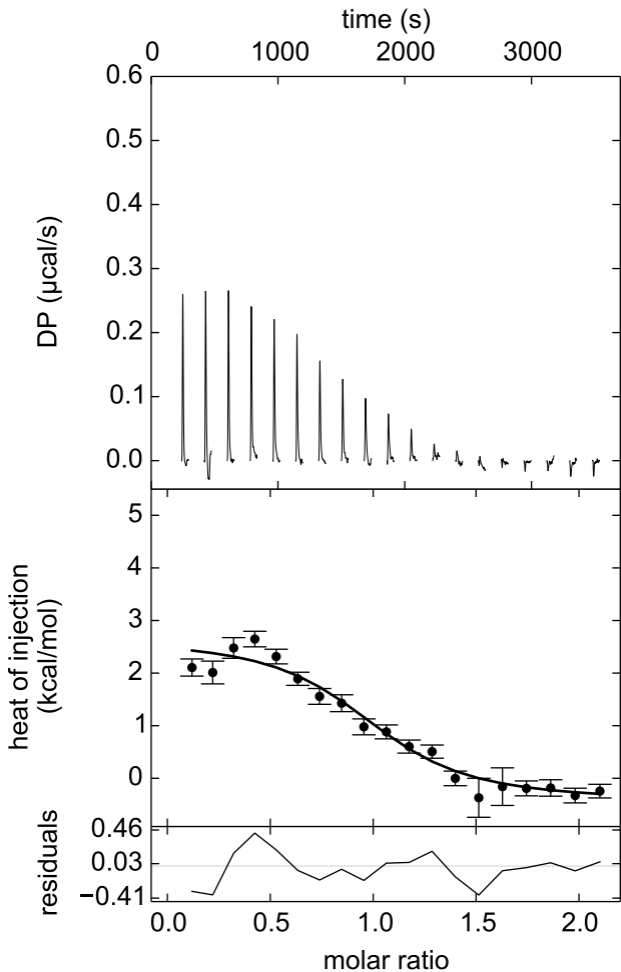

Supplement: supp [file elife-85039-supp-v1.zip]

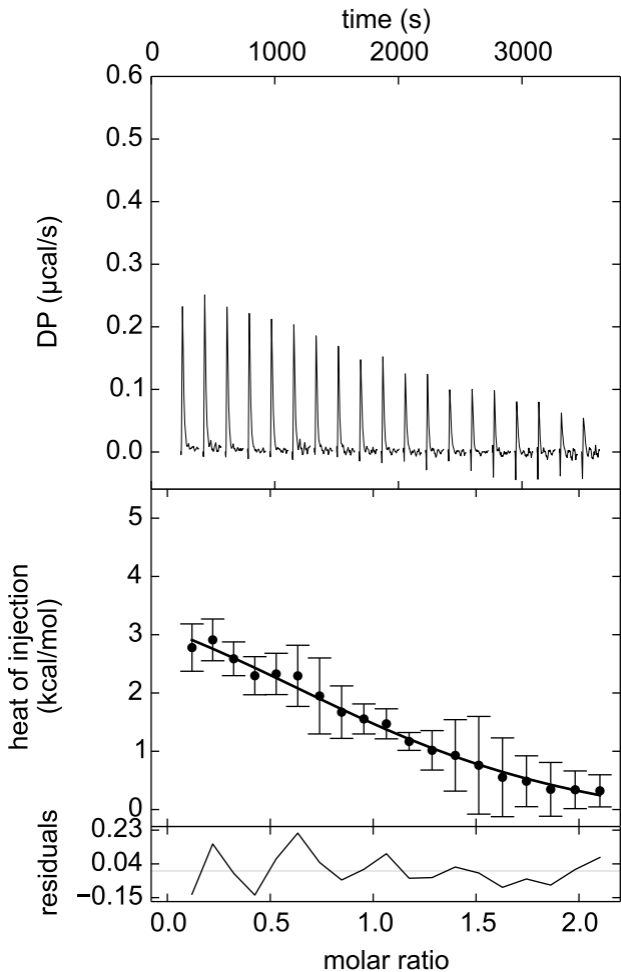

Supplement: supp [file elife-85039-supp-v1.zip]
